# Supplementary material for: Features of repertoire diversity and gene expression in human cytotoxic T cells following allogeneic hematopoietic cell transplantation
Source: PubMed Central journal article supplement (PMC8505416; doi:10.1038/s42003-021-02709-7), 2021-10-11
Supplement: 42003_2021_2709_MOESM3_ESM.pdf [file 42003_2021_2709_MOESM3_ESM.pdf]

## Description of Additional Supplementary Files

**File name:** Supplementary Data

**Description:** Source data for main Figures.
